# Supplementary material
Source: Royal Society of Chemistry journal article supplement (doi:10.1039/d6nr00474a)
Supplement: d6nr00474a1.pdf [file d6nr00474a1.pdf]

# **Pyrolysis-Tuned Carbon Nitride with Synergistic K-Bridged Channels and Vacancies for Boosting H<sub>2</sub>O<sub>2</sub> Production and Tetracycline Degradation**

Dan Zhang<sup>a</sup>, Lu Zhang<sup>a</sup>, Xiaodong Ma<sup>b</sup>, Zhiyuan Chen<sup>c</sup>, Tinggang Ma<sup>d</sup>, Ye Wang<sup>a\*</sup>, Wenxiang  
Tang<sup>a\*</sup>

a. School of Chemical Engineering, Sichuan University, Chengdu, 610065, China

b. Sustainable Minerals Institute, University of Queensland, Brisbane, 4072, QLD, Australia

c. Flemish Institute for Technological Research (VITO), Boeretang 200, 2400, Mol, Belgium

d. Rod and Wire Material Company, Baoji Titanium Industry Co., Ltd., 721014, P. R. China

\*E-mail: wangye@scu.edu.cn (Ye Wang); scutang@scu.edu.cn (Wenxiang Tang)

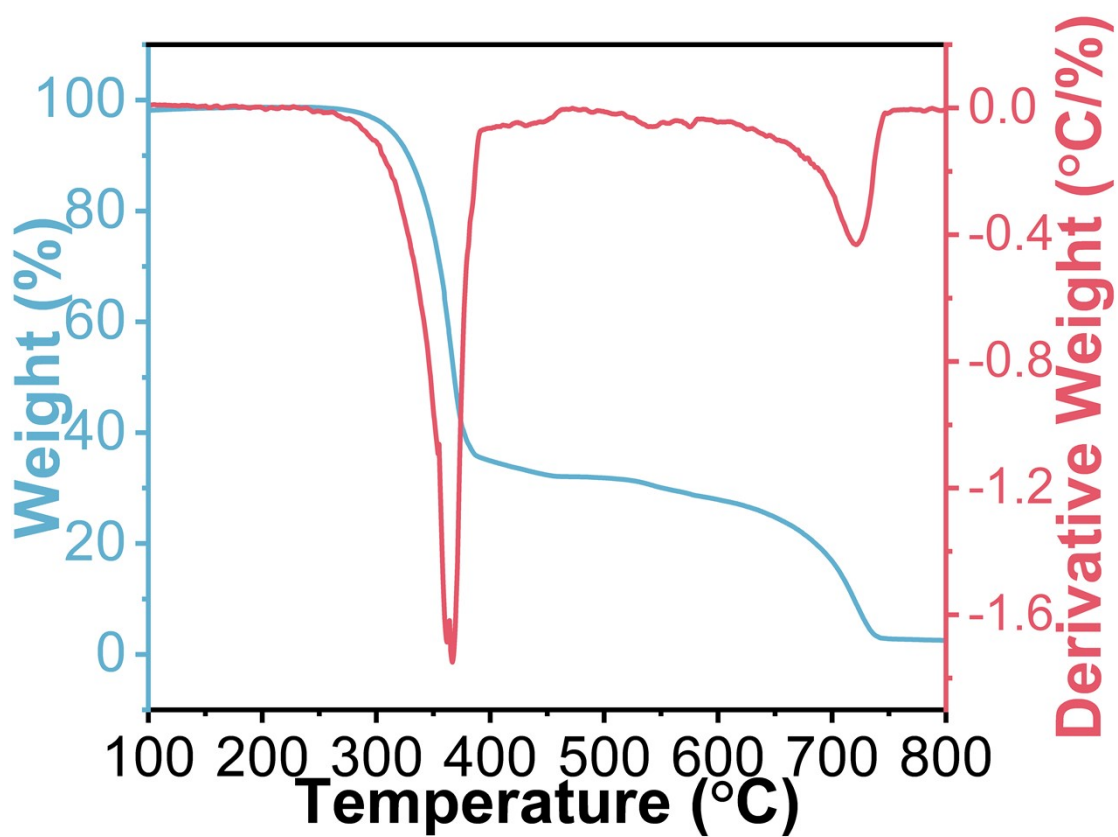

Fig. S1 TG and DTA curves of CN precursor.

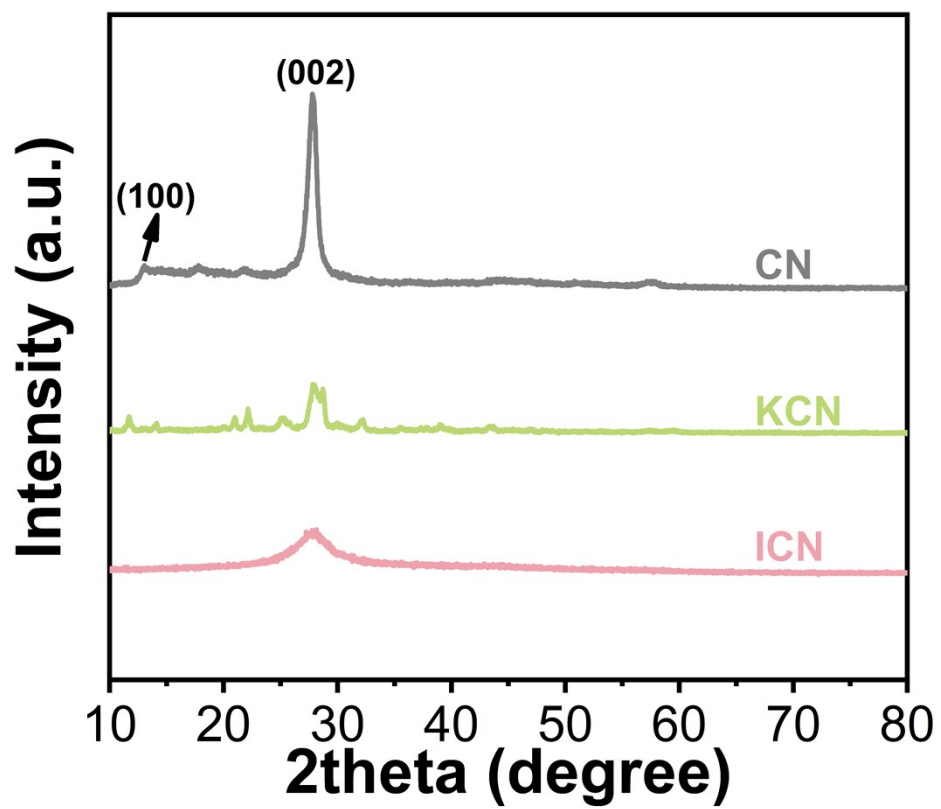

Fig. S2 XRD patterns of CN, KCN and ICN.

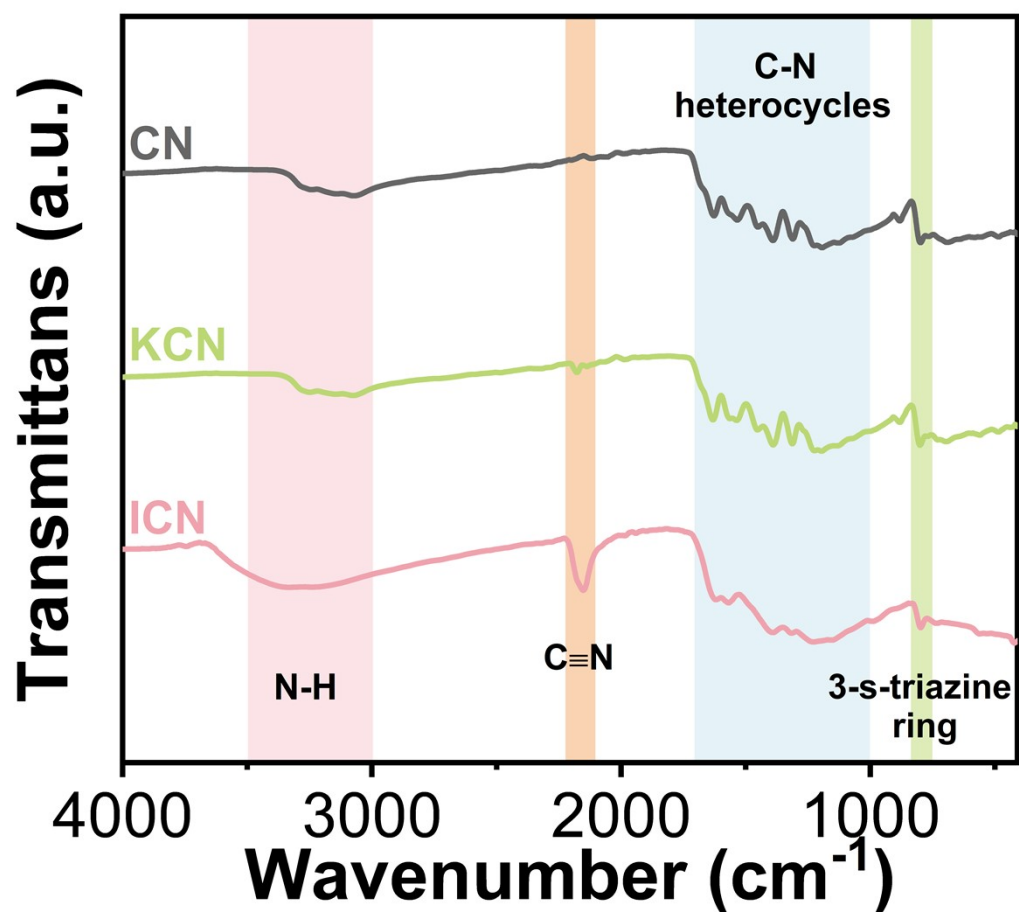

Fig. S3 FTIR spectra of CN, KCN and ICN.

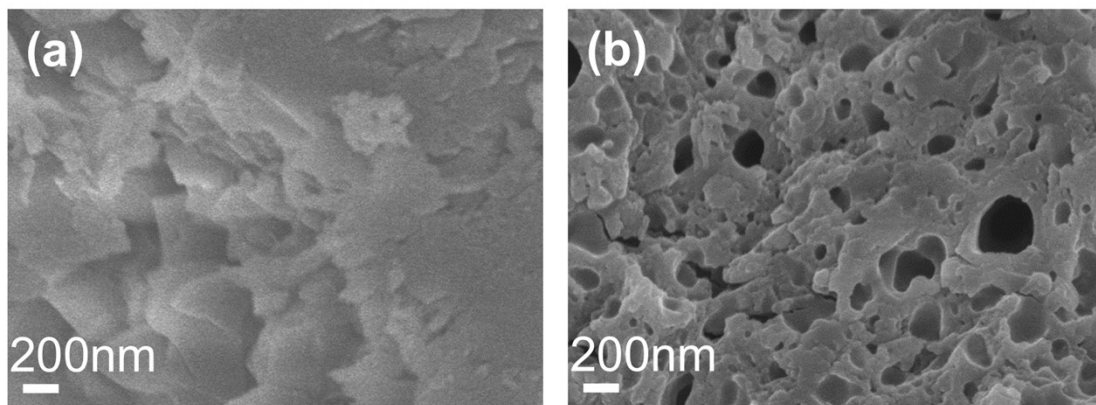

**Fig. S4** SEM images of KCN (a) and ICN (b)

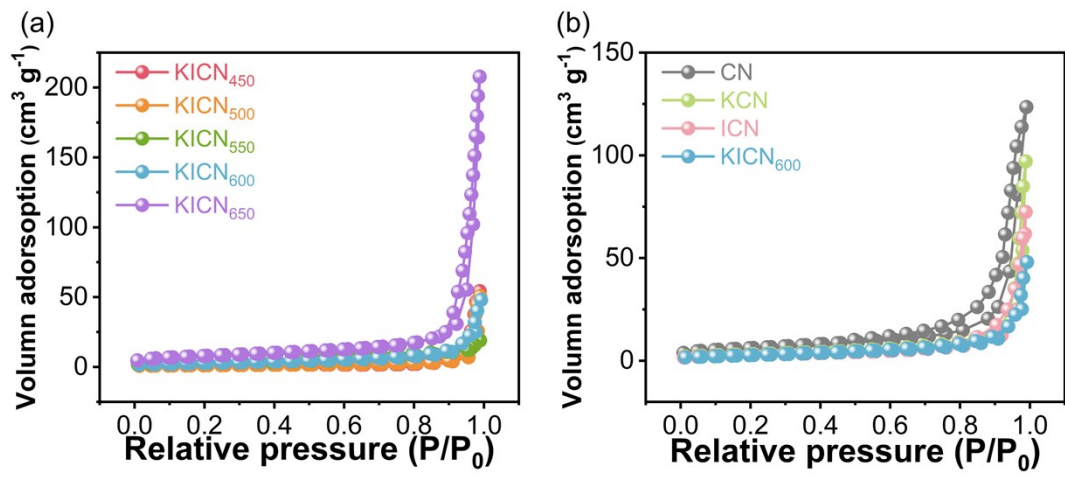

**Fig. S5** Comparison of N<sub>2</sub> adsorption-desorption isotherms for KICN<sub>T</sub> (T = 450, 500, 550, 600 and 650°C) (a); Comparison of N<sub>2</sub> adsorption-desorption isotherms for CN, KCN, ICN, and KICN<sub>600</sub> (b).

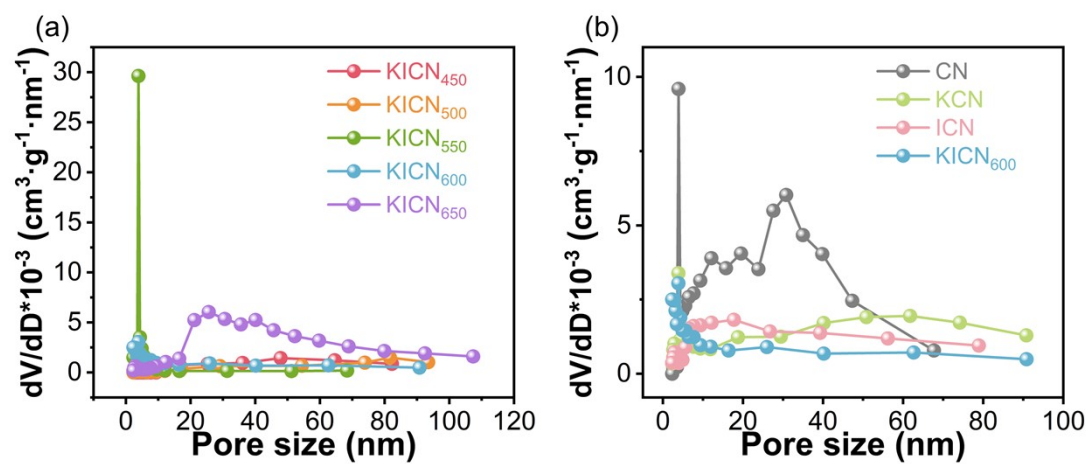

**Fig. S6** Comparison of BJH pore size distributions for KICN<sub>T</sub> (T = 450, 500, 550, 600 and 650°C) (a); Comparison of BJH pore size distributions for CN, KCN, ICN, and KICN<sub>600</sub> (b).

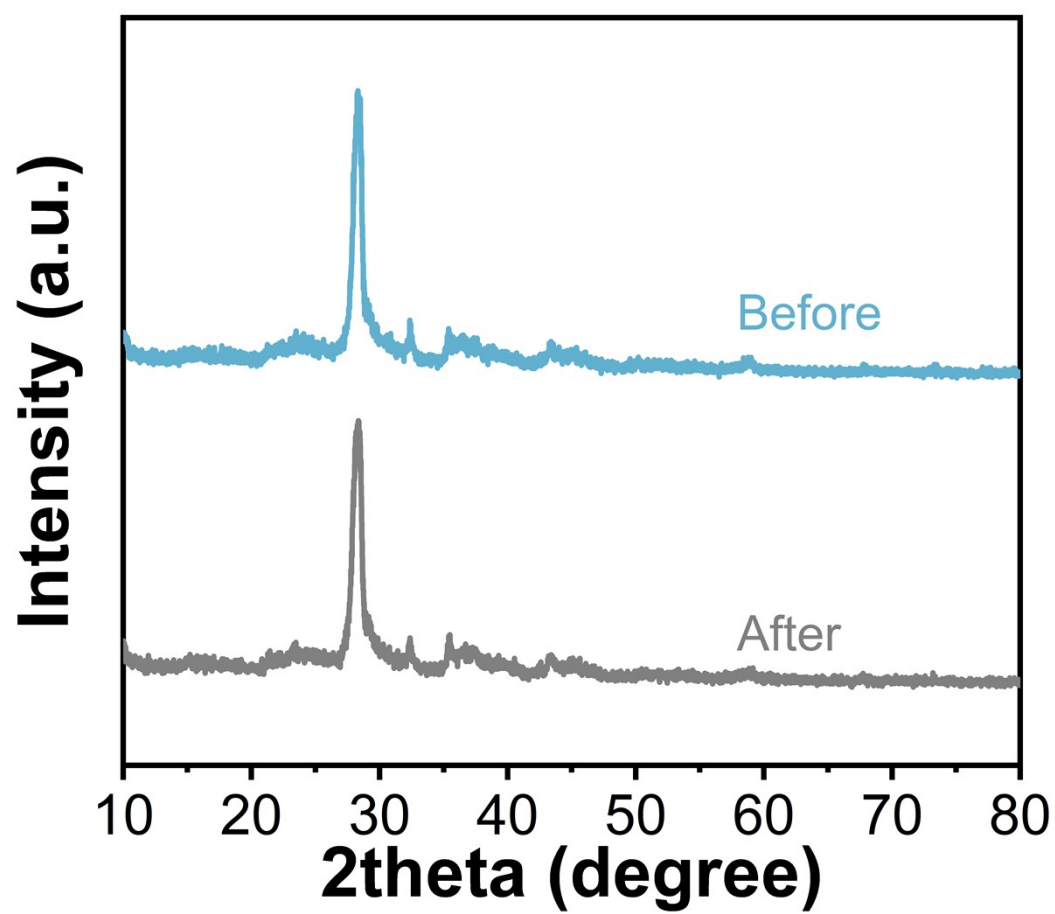

Fig. S7 XRD patterns of KICN<sub>600</sub> before and after reactions.

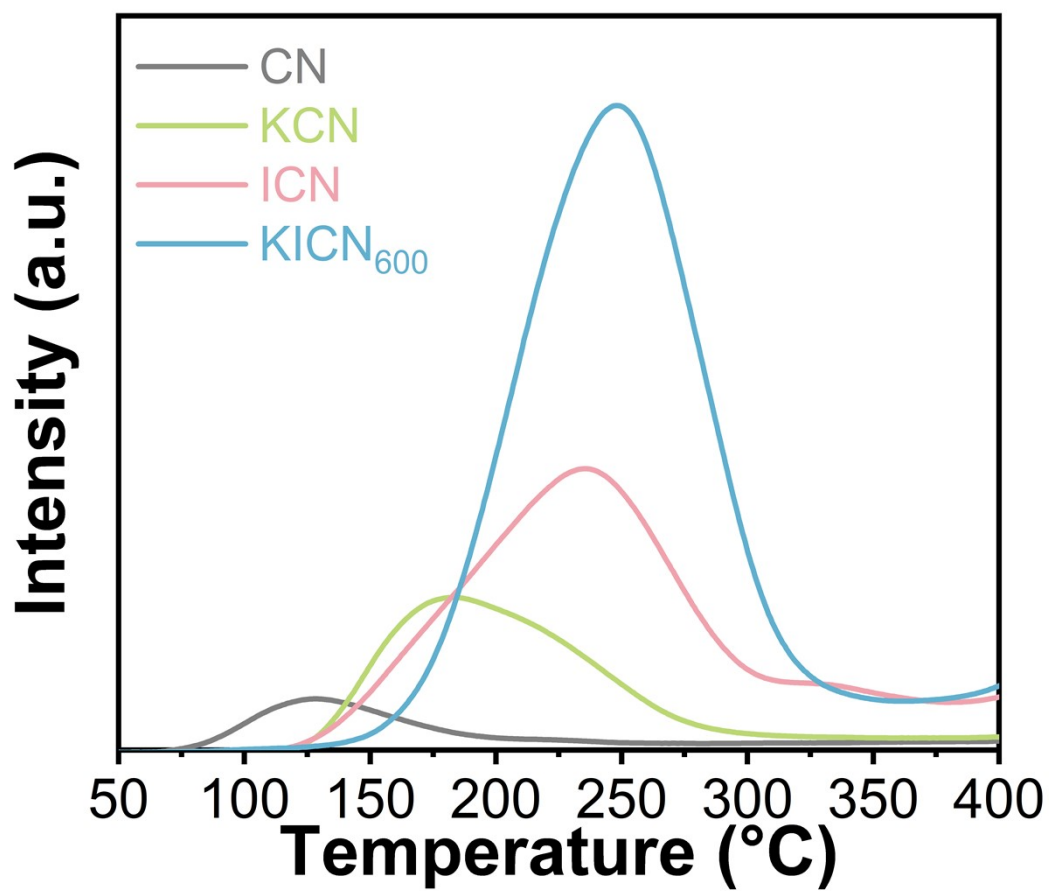

**Fig. S8** O<sub>2</sub>-TPD curves for CN, KCN, ICN, and KICN<sub>600</sub>

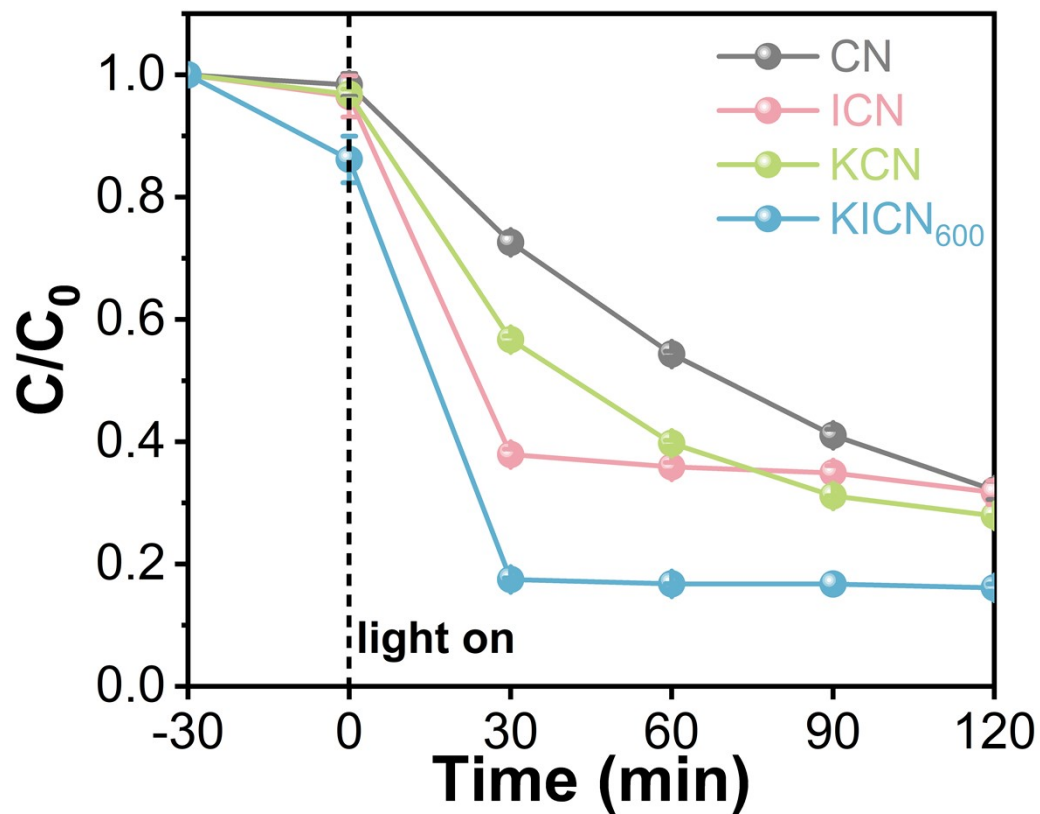

Fig. S9 photocatalytic tetracycline degradation performance of CN, ICN, KCN and KICN<sub>600</sub>.

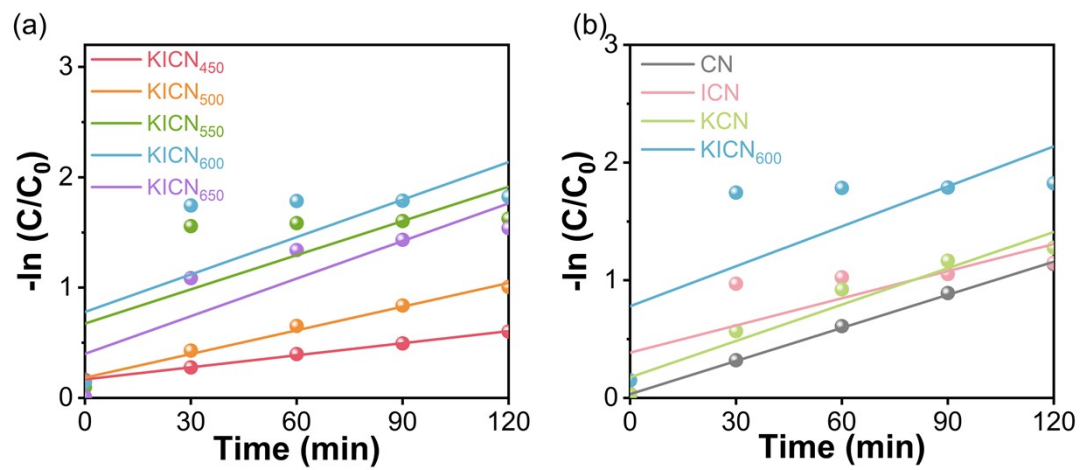

**Fig. S10** The pseudo-first-order reaction kinetics of the photocatalytic degradation of TC by KICN<sub>T</sub> (a) and CN, KCN, ICN, and KICN<sub>600</sub> (b)

| Sample              | S <sub>BET</sub> (m <sup>2</sup> g <sup>-1</sup> ) | Pore size (nm) | Pore Volume (m <sup>3</sup> g <sup>-1</sup> ) |
|---------------------|----------------------------------------------------|----------------|-----------------------------------------------|
| KICN <sub>450</sub> | 5.44                                               | 21.38          | 0.075                                         |
| KICN <sub>500</sub> | 4.04                                               | 25.78          | 0.070                                         |
| KICN <sub>550</sub> | 10.05                                              | 2.79           | 0.030                                         |
| KICN <sub>600</sub> | 10.19                                              | 7.92           | 0.066                                         |
| KICN <sub>650</sub> | 26.51                                              | 18.98          | 0.304                                         |
| CN                  | 22.05                                              | 9.9            | 0.186                                         |
| KCN                 | 11.26                                              | 15.66          | 0.134                                         |
| ICN                 | 10.10                                              | 12.49          | 0.095                                         |

**Table S1** Summary of structural characteristics for all samples

**Table S2** XPS elemental analysis results for CN, KICN<sub>550</sub>, KICN<sub>600</sub>, and KICN<sub>650</sub>

| Sample              | C (at %) | N (at %) | K (at %) | I (at %) | C/N (molar ratio) |
|---------------------|----------|----------|----------|----------|-------------------|
| CN                  | 60.98    | 39.02    | -        | -        | 1.56              |
| KICN <sub>550</sub> | 51.34    | 47.03    | 1.43     | 0.2      | 1.09              |
| KICN <sub>600</sub> | 48.84    | 45.96    | 5.01     | 0.19     | 1.06              |
| KICN <sub>650</sub> | 73.61    | 23       | 3.35     | 0.05     | 3.2               |

**Table S3** Fractions of C 1s XPS spectra

| Sample              | XPS peak configuration |                            |              |
|---------------------|------------------------|----------------------------|--------------|
|                     | N-C=N (%)              | C-NH <sub>x</sub> /C≡C (%) | C-C//C=C (%) |
| CN                  | 0.51                   | 0.07                       | 0.42         |
| KICN <sub>550</sub> | 0.64                   | 0.06                       | 0.31         |
| KICN <sub>600</sub> | 0.59                   | 0.16                       | 0.25         |
| KICN <sub>650</sub> | 0.11                   | 0.34                       | 0.55         |

**Table S4** Fractions of N 1s XPS spectra

| Sample              | XPS peak configuration |                      |                        |           |
|---------------------|------------------------|----------------------|------------------------|-----------|
|                     | $\pi$ - $\pi^*$ (%)    | -NH <sub>x</sub> (%) | N-(C) <sub>3</sub> (%) | C-N=C (%) |
| CN                  | 0.08                   | 0.09                 | 0.23                   | 0.60      |
| KICN <sub>550</sub> | 0.08                   | 0.09                 | 0.19                   | 0.63      |
| KICN <sub>600</sub> | 0.10                   | 0.15                 | 0.12                   | 0.63      |
| KICN <sub>650</sub> | 0.04                   | 0.28                 | 0.28                   | 0.40      |

**Table S5** K and I element contents in KICN<sub>550</sub>, KICN<sub>600</sub>, and KICN<sub>650</sub> obtained from ICP-MS

| Sample              | K (wt %) | I (wt %) |
|---------------------|----------|----------|
| KICN <sub>550</sub> | 3.84     | 1.84     |
| KICN <sub>600</sub> | 15.47    | 0.60     |
| KICN <sub>650</sub> | 10.87    | 0.05     |

**Table S6** Comparison of data for photocatalytic production of H<sub>2</sub>O<sub>2</sub> over different catalysts

| Photocatalyst                                                   | Light    | Sacrificial agents | Gas            | Evolution rates (μmol g <sup>-1</sup> h <sup>-1</sup> ) | Ref.      |
|-----------------------------------------------------------------|----------|--------------------|----------------|---------------------------------------------------------|-----------|
| OCN                                                             | λ>420 nm | 10 vol% IPA        | O <sub>2</sub> | 1200                                                    | 1         |
| DCN                                                             | λ>420 nm | 20 vol% IPA        | O <sub>2</sub> | 96.8                                                    | 2         |
| Ti <sub>3</sub> C <sub>2</sub> /g-C <sub>3</sub> N <sub>4</sub> | λ>420 nm | 10 vol% IPA        | O <sub>2</sub> | 131.71                                                  | 3         |
| CN <sub>4</sub>                                                 | λ>420 nm | 10 vol% IPA        | O <sub>2</sub> | 574                                                     | 4         |
| NDCN                                                            | λ>420 nm | 10 vol% IPA        | O <sub>2</sub> | 476                                                     | 5         |
| K-CN-2                                                          | λ>420 nm | 20 vol% IPA        | O <sub>2</sub> | 266                                                     | 6         |
| Ni <sub>4</sub> %/O <sub>0.2</sub> tCN                          | λ>420 nm | 10 vol% EtOH       | O <sub>2</sub> | 2464                                                    | 7         |
| PCN                                                             | λ>420 nm | 10 vol% IPA        | O <sub>2</sub> | 1071.7                                                  | 8         |
| CDs <sub>10</sub> MCN                                           | λ>420 nm | 10 vol% IPA        | O <sub>2</sub> | 423                                                     | 9         |
| NDKCN                                                           | AM 1.5   | 10 vol% EtOH       | O <sub>2</sub> | 2340.3                                                  | 10        |
| S-CNT-Zn                                                        | λ>420 nm | 20 vol% EtOH       | O <sub>2</sub> | 2708                                                    | 11        |
| KICN <sub>600</sub>                                             | λ>400 nm | 10 vol% IPA        | Air            | 3067.5                                                  | This work |

**Table S7** K and I element contents in KICN<sub>600</sub> before and after recycling obtained from ICP-MS

| Sample                      | K (wt %) | I (wt %) |
|-----------------------------|----------|----------|
| KICN <sub>600</sub> -before | 15.47    | 0.60     |
| KICN <sub>600</sub> -after  | 13.10    | 0.51     |

**Table S8** Comparison of photocatalytic degradation data for tetracycline over different catalysts

| Photocatalyst                                          | Light                                                  | TC concentration (mg L <sup>-1</sup> ) | Time (min) | Efficiency (%) | Ref.      |
|--------------------------------------------------------|--------------------------------------------------------|----------------------------------------|------------|----------------|-----------|
| PbMoO <sub>4</sub>                                     | Xe lamp, 35W,<br>-                                     | 10                                     | 180        | 55             | 12        |
| LaMnO <sub>3</sub> /g-C <sub>3</sub> N <sub>4</sub>    | Xe lamp, 300 W,<br>$\lambda > 420$ nm                  | 20                                     | 120        | 61.4           | 13        |
| SrTiO <sub>3</sub> /Ag/Ag <sub>3</sub> PO <sub>4</sub> | Xe lamp, 500 W,<br>$\lambda > 420$ nm                  | 10                                     | 15         | 72             | 14        |
| B-TiO <sub>2</sub>                                     | Xe lamp, 1000W,<br>$\lambda > 400$ nm                  | 10                                     | 240        | 66.2           | 15        |
| PTI/g-C <sub>3</sub> N <sub>4</sub>                    | Xe lamp, 500W<br>-                                     | 10                                     | 150        | 68             | 16        |
| BWO-O <sub>3</sub>                                     | Xe lamp, 300 W,<br>$\lambda > 420$ nm<br>12 W LED      | 20                                     | 180        | 79.68          | 17        |
| BiOI/Bi <sub>2</sub> O <sub>3</sub>                    | -<br>400 nm < $\lambda$ < 780 nm<br>metal halide lamp, | 20                                     | 120        | 80.01          | 18        |
| MgO NFs                                                | 400 W<br>-                                             | 10                                     | 120        | 77.3           | 19        |
| Cl-BiOBr                                               | Xe lamp, 500W<br>-                                     | 20                                     | 120        | 76.2           | 20        |
| KICN <sub>600</sub>                                    | Xe lamp, 300 W,<br>$\lambda > 400$ nm                  | 80                                     | 120        | 83.9           | This work |

## References

- 1 Z. Wei, M. Liu, Z. Zhang, W. Yao, H. Tan and Y. Zhu, *Energy Environ. Sci.*, 2018, **11**, 2581–2589.
- 2 L. Shi, L. Yang, W. Zhou, Y. Liu, L. Yin, X. Hai, H. Song and J. Ye, *Small*, 2018, **14**, 1703142.
- 3 Y. Yang, Z. Zeng, G. Zeng, D. Huang, R. Xiao, C. Zhang, C. Zhou, W. Xiong, W. Wang, M. Cheng, W. Xue, H. Guo, X. Tang and D. He, *Appl. Catal. B Environ.*, 2019, **258**, 117956.
- 4 C. Feng, L. Tang, Y. Deng, J. Wang, J. Luo, Y. Liu, X. Ouyang, H. Yang, J. Yu and J. Wang, *Adv. Funct. Mater.*, 2020, **30**, 2001922.
- 5 J. Luo, Y. Liu, C. Fan, L. Tang, S. Yang, M. Liu, M. Wang, C. Feng, X. Ouyang, L. Wang, L. Xu, J. Wang and M. Yan, *ACS Catal.*, 2021, **11**, 11440–11450.
- 6 T. Wu, Q. He, Z. Liu, B. Shao, Q. Liang, Y. Pan, J. Huang, Z. Peng, Y. Liu, C. Zhao, X. Yuan, L. Tang and S. Gong, *J. Hazard. Mater.*, 2022, **424**, 127177.
- 7 R. Du, K. Xiao, B. Li, X. Han, C. Zhang, X. Wang, Y. Zuo, P. Guardia, J. Li, J. Chen, J. Arbiol and A. Cabot, *Chem. Eng. J.*, 2022, **441**, 135999.
- 8 L. Xu, L. Li, Z. Hu and J. C. Yu, *Appl. Catal. B Environ.*, 2023, **328**, 122490.
- 9 H. Guo, L. Zhou, K. Huang, Y. Li, W. Hou, H. Liao, C. Lian, S. Yang, D. Wu, Z. Lei, Z. Liu and L. Wang, *Adv. Funct. Mater.*, 2024, **34**, 2402650.
- 10 X. Li, H. Wang, S. Li, Y. Xu and Z. Bian, *Sci. Total Environ.*, 2024, **926**, 172109.
- 11 S. Sun, F. Gao and H. Yang, *Adv. Sci.*, 2025, e13453.
- 12 S. Obregón, D. B. Hernández-Uresti, A. Vázquez and D. Sánchez-Martínez, *Appl. Surf. Sci.*, 2018, **457**, 501–507.

- 13 J. Luo, J. Chen, R. Guo, Y. Qiu, W. Li, X. Zhou, X. Ning and L. Zhan, *Sep. Purif. Technol.*, 2019, **211**, 882–894.
- 14 X. Yu, J. Wang, X. Fu, H. Meng, Y. Zhu and Y. Zhang, *Sep. Purif. Technol.*, 2020, **241**, 116718.
- 15 S. Wu, X. Li, Y. Tian, Y. Lin and Y. H. Hu, *Chem. Eng. J.*, 2021, **406**, 126747.
- 16 X. Dong, X. Huang, D. Wang, Y. Lei, J. Han, X. Liang and Q. Wei, *J. Mater. Sci. Mater. Electron.*, 2022, **33**, 6043–6058.
- 17 L. Chen, B. Xu, M. Jin, L. Chen, G. Yi, B. Xing, Y. Zhang, Y. Wu and Z. Li, *J. Mol. Struct.*, 2023, **1278**, 134911.
- 18 P. Lu, Y. Peng, Y. Yang, S. Chen, J. Shang, C. Yang, M. Xu, J. Bai, Z. Zhao and X. Hu, *J. Environ. Chem. Eng.*, 2024, **12**, 114395.
- 19 S. M. Bekhit, S. A. Zaki, M. S. E.-D. Hassouna and M. Elkady, *J. Inorg. Organomet. Polym. Mater.*, 2024, **34**, 5006–5019.
- 20 J. Sun and Y. Zhao, *ChemistrySelect*, 2025, **10**, e01605.
